# Supplementary material for: Efficacy and Safety of Thermal Ablation after Endoscopic Mucosal Resection: A Systematic Review and Network Meta-Analysis
Source: MDPI journal article supplement (doi:10.3390/jcm13051298), 2024-02-25
Supplement: s1 [file s1]

**Supplementary Table S1.** Embase search strategy.

| No. | Query                                                                                                                                                                                                                                                                                                    | Results |
|-----|----------------------------------------------------------------------------------------------------------------------------------------------------------------------------------------------------------------------------------------------------------------------------------------------------------|---------|
| #1  | endoscopic mucosal resection*' OR 'emr' OR 'endoscopic aspiration mucosectom*' OR 'endoscopic mucosa resection*' OR 'endoscopic mucosectom*' OR 'endoscopic mucous membrane resection*' OR 'endoscopic mucosal resection'/syn                                                                            | 32874   |
| #2  | 'argon plasma coagulation'/syn OR 'argon plasma coagulat*' OR 'argon beam coagulat*' OR 'apc' OR 'ar plasma*' OR 'argon plasma*'                                                                                                                                                                         | 62805   |
| #3  | 'snare tip soft coagulation'/syn OR 'snare tip soft coagulat*' OR 'stsc'                                                                                                                                                                                                                                 | 161     |
| #4  | #2 OR #3                                                                                                                                                                                                                                                                                                 | 62937   |
| #5  | #1 AND #4                                                                                                                                                                                                                                                                                                | 1125    |
| #6  | colon*:ti,ab,kw,de OR colorect*:ti,ab,kw,de OR rectum*:ti,ab,kw,de OR rectal*:ti,ab,kw,de OR 'colorectal polyp'/syn OR 'colorectal adenoma'/syn                                                                                                                                                          | 1454272 |
| #7  | #5 AND #6                                                                                                                                                                                                                                                                                                | 540     |
| #8  | #7 NOT ([animals]/lim NOT [humans]/lim) NOT ('conference review'/it OR 'editorial'/it OR 'letter'/it OR 'note'/it OR 'review'/it OR 'short survey'/it OR 'tombstone'/it OR 'case report'/de OR 'meta analysis'/de OR 'meta analysis topic'/de OR 'systematic review'/de OR 'systematic review topic'/de) | 394     |

**Supplementary Table S2.** Risk of bias in non-randomized studies of interventions (ROBINS-I) scale for illustration of risk of bias of studies.

| Study           | Confounding | Selection | Intervention Classification | Deviation from Intervention | Missing Data | Measurement of Outcome | Selection of Reported Results | Total |
|-----------------|-------------|-----------|-----------------------------|-----------------------------|--------------|------------------------|-------------------------------|-------|
| Abu Arisha 2023 | Low         | Low       | Low                         | Low                         | Low          | Low                    | Low                           | Low   |
| Groff 2020      | Low         | Low       | Low                         | Low                         | Low          | Low                    | Low                           | Low   |
| Kandel 2019     | Low         | Low       | Low                         | Low                         | Low          | Low                    | Low                           | Low   |
| Katsinelos 2019 | Low         | Low       | Low                         | Low                         | Low          | Low                    | Low                           | Low   |
| Levenick 2022   | Low         | Low       | Low                         | Low                         | Low          | Low                    | Low                           | Low   |
| Nader 2022      | Low         | Low       | Low                         | Low                         | Low          | Low                    | Low                           | Low   |
| Perez 2021 (1)  | Low         | Low       | Low                         | Low                         | Low          | Low                    | Low                           | Low   |
| Perez 2021 (2)  | Low         | Low       | Low                         | Low                         | Low          | Low                    | Low                           | Low   |
| Wehbeh 2020     | Low         | Low       | Low                         | Low                         | Low          | Low                    | Low                           | Low   |

**Supplementary Table S3.** Risk of bias table of randomized controlled trials using Cochrane risk of bias tool.

| Study            | Random Sequence Generation (Selection bias) | Allocation Concealment (Selection Bias) | Blinding of Participants and Personnel (Performance Bias) | Blinding of Outcome Assessment (Detection Bias) | Incomplete Outcome Data (Attrition Bias) | Selective Reporting (Reporting Bias) |
|------------------|---------------------------------------------|-----------------------------------------|-----------------------------------------------------------|-------------------------------------------------|------------------------------------------|--------------------------------------|
| Albuquerque 2013 | Unclear                                     | Low                                     | High                                                      | Unclear                                         | Low                                      | Low                                  |
| Brooker 2002     | Unclear                                     | Low                                     | High                                                      | Unclear                                         | Low                                      | Low                                  |
| Klein 2019       | Low                                         | Low                                     | High                                                      | High                                            | Low                                      | Low                                  |
| Rex 2023         | Low                                         | Low                                     | High                                                      | High                                            | Low                                      | Low                                  |
| Senada 2020      | Unclear                                     | Low                                     | High                                                      | Unclear                                         | Low                                      | Low                                  |

**Supplementary Table S4.** Sensitivity analysis of network meta-analysis using netsplit technique.

| Comparison           | K | Prop | Nma   | Direct | Indir. | Diff  | Z     | p-Value |
|----------------------|---|------|-------|--------|--------|-------|-------|---------|
| Recurrence           |   |      |       |        |        |       |       |         |
| APC:placebo          | 5 | 0.74 | -1.12 | -0.98  | -1.51  | 0.53  | 0.90  | 0.3666  |
| APC:STSC             | 2 | 0.53 | 0.21  | 0.18   | 0.23   | -0.05 | -0.09 | 0.9274  |
| STSC:placebo         | 9 | 0.97 | -1.32 | -1.35  | -0.70  | -0.64 | -0.98 | 0.3288  |
| Total adverse events |   |      |       |        |        |       |       |         |
| APC:placebo          | 3 | 0.60 | -0.63 | -0.69  | -0.53  | -0.16 | -0.28 | 0.7772  |
| APC:STSC             | 2 | 0.74 | -0.09 | -0.08  | -0.11  | 0.03  | 0.05  | 0.9622  |
| STSC:placebo         | 3 | 0.95 | -0.54 | -0.51  | -1.02  | 0.51  | 0.73  | 0.4657  |

k: Number of studies providing direct evidence, prop: Direct evidence proportion, nma: Estimated treatment effect (logOR) in network meta-analysis, direct: Estimated treatment effect (logOR)

derived from direct evidence, indir.: Estimated treatment effect (logOR) derived from indirect evidence, Diff: Difference between direct and indirect treatment estimates, z: z-value of test for disagreement (direct versus indirect) (APC: argon plasma coagulation, STSC: snare tip soft coagulation).

A.

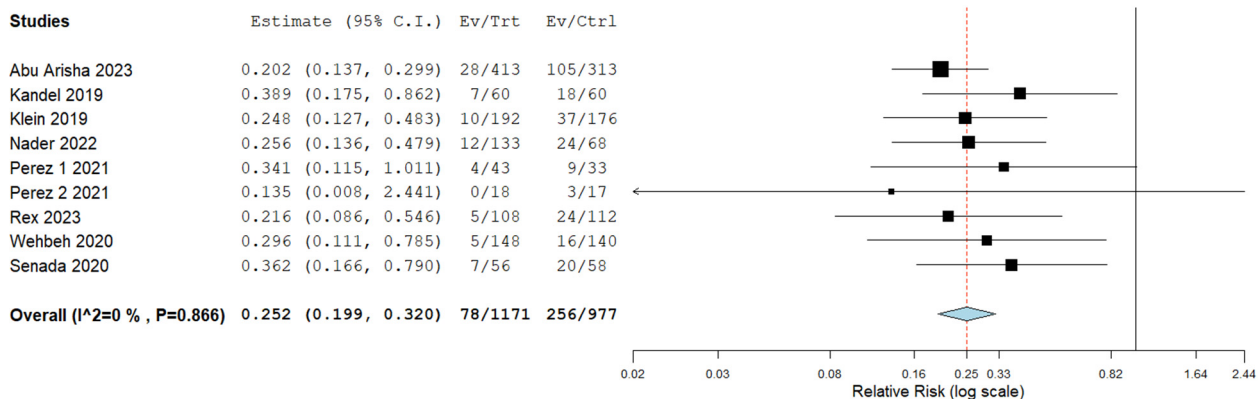

B.

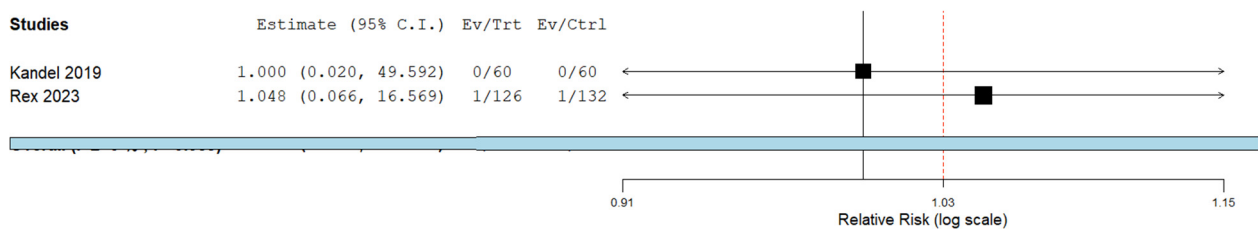

C.

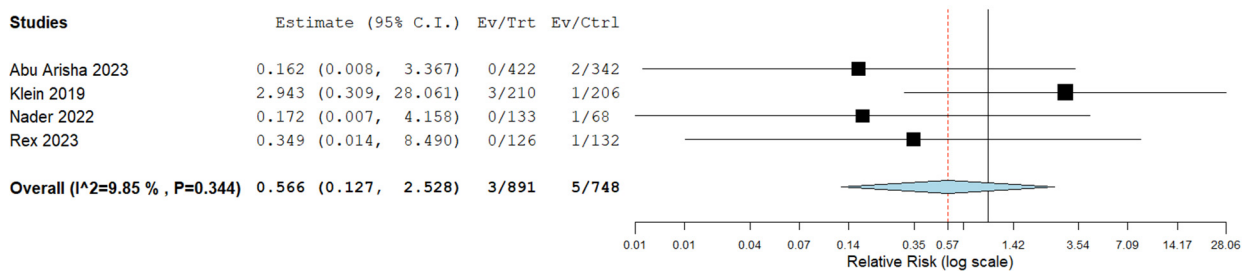

D.

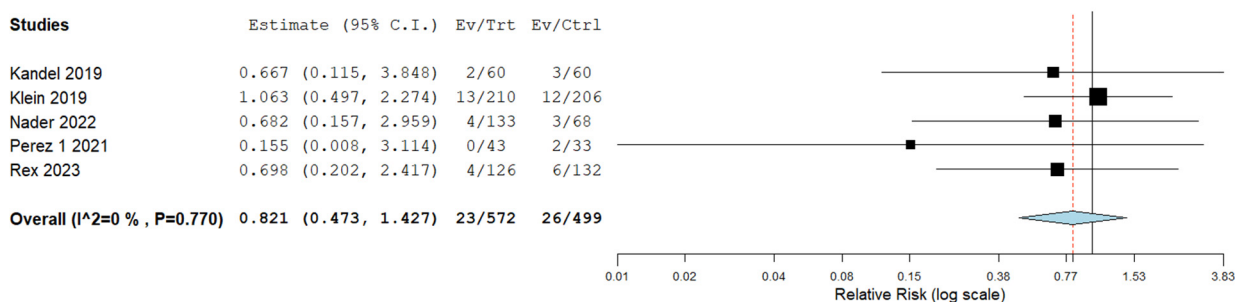

E.

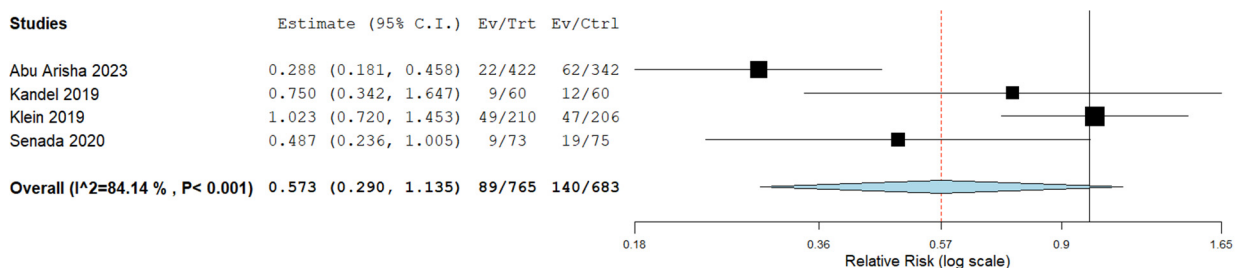

F.

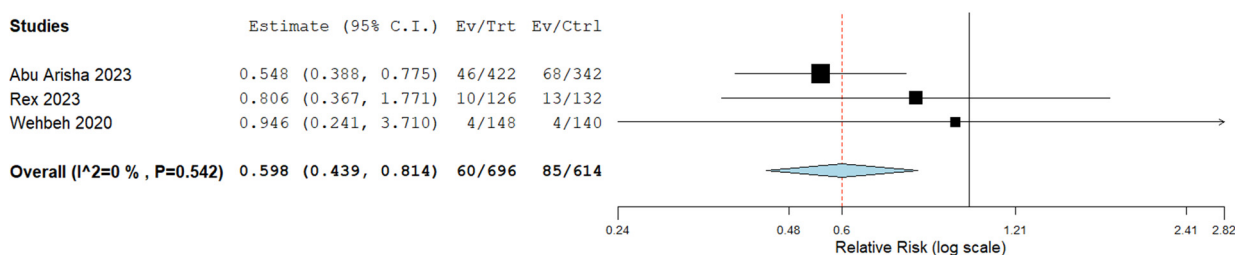

**Supplementary Figure S1.** A. Forest plot for recurrence rate in snare tip soft coagulation compared to placebo in studies. B. Forest plot demonstrating post polypectomy syndrome in snare tip soft coagulation compared to placebo in studies. C. Forest plot showing perforation rate in snare tip soft coagulation compared to placebo in studies. D. Forest plot for delayed bleeding in snare tip soft coagulation compared to placebo in studies. E. Forest plot demonstrating intraprocedural bleeding in snare tip soft coagulation compared to placebo in studies. F. Forest plot illustrating total adverse events in snare tip soft coagulation compared to placebo in studies in this meta-analysis.

A.

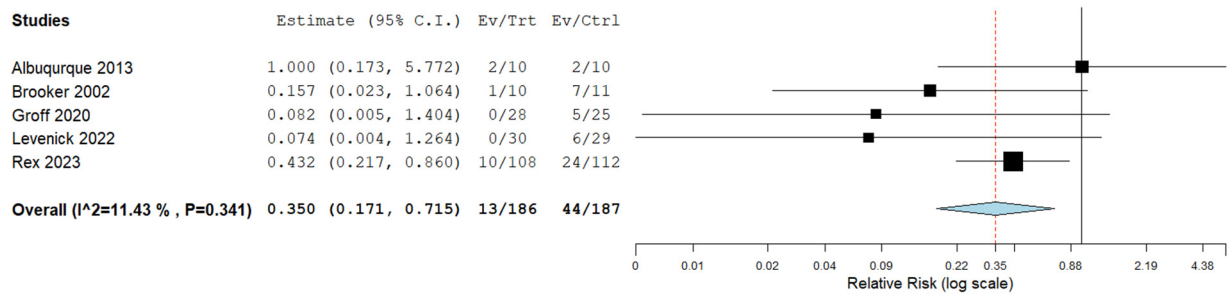

B.

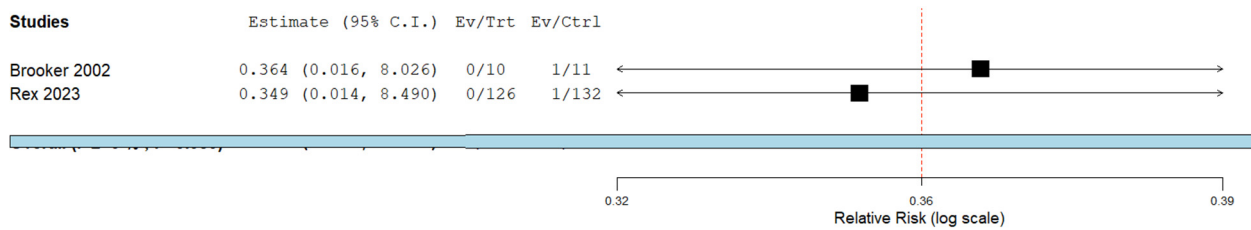

C.

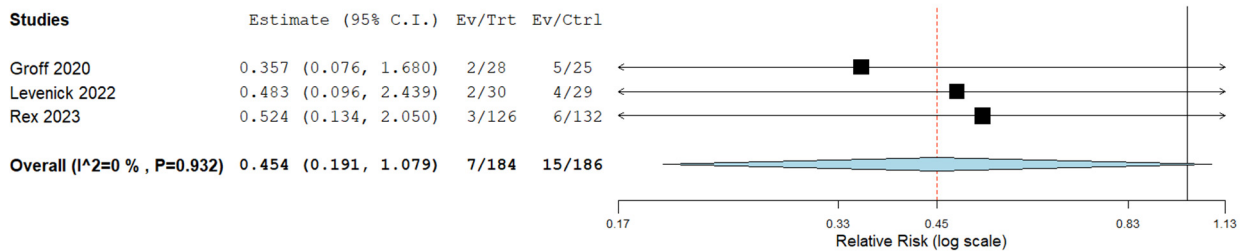

D.

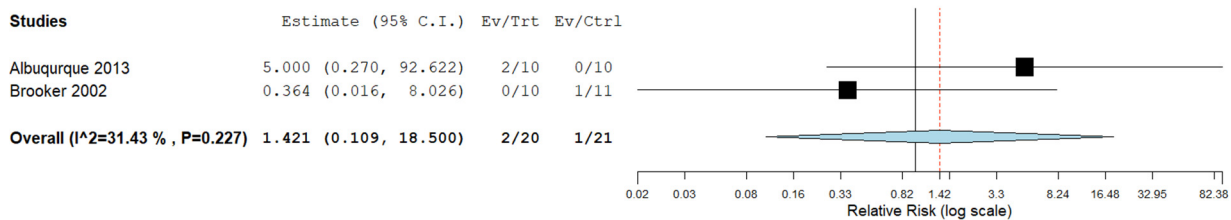

E.

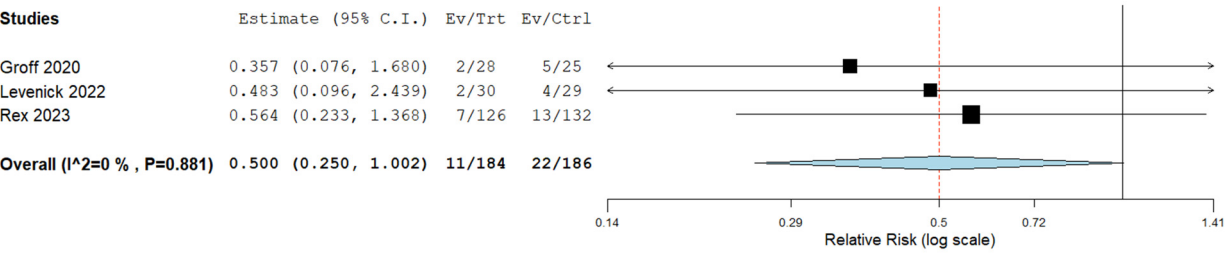

**Supplementary Figure S2.** A. Forest plot for recurrence rate in argon plasma coagulation compared to placebo in studies. B. Forest plot demonstrating post polypectomy syndrome in studies comparing argon plasma coagulation compared to placebo. C. Forest plot for delayed bleeding in studies comparing argon plasma coagulation to placebo. D. Forest plot demonstrating intraprocedural bleeding in studies comparing argon plasma coagulation to placebo. E. Forest plot illustrating total adverse events in studies comparing argon plasma coagulation to placebo in this meta-analysis.

A.

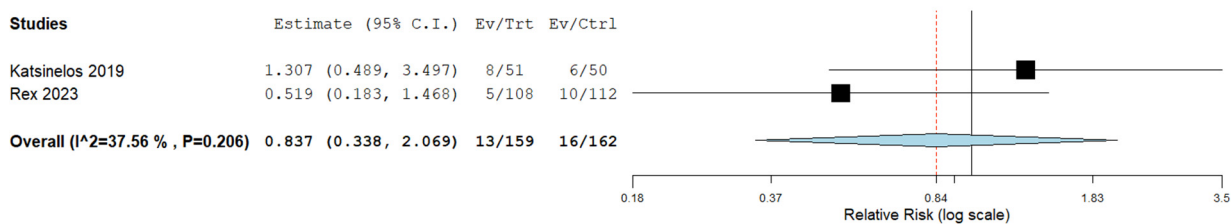

B.

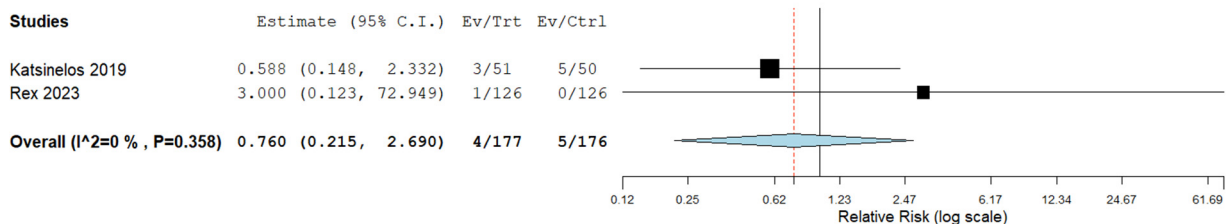

C.

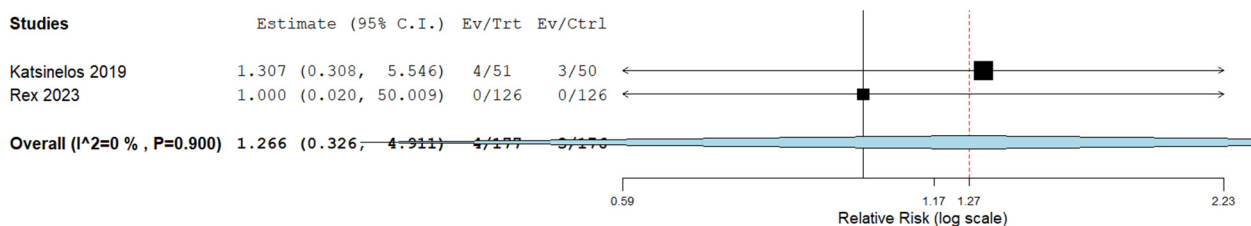

D.

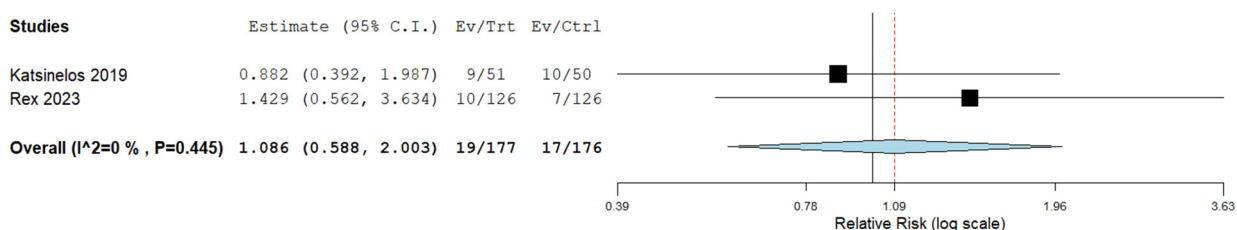

**Supplementary Figure S3.** A. Forest plot for recurrence rate in snare tip soft coagulation compared to argon plasma coagulation in studies. B. Forest plot demonstrating post polypectomy syndrome in snare tip soft coagulation compared to argon plasma coagulation in studies. C. Forest plot showing perforation rate in snare tip soft coagulation compared to argon plasma coagulation in studies. D. Forest plot illustrating total adverse events in snare tip soft coagulation compared to argon plasma coagulation in studies in this meta-analysis.

A.

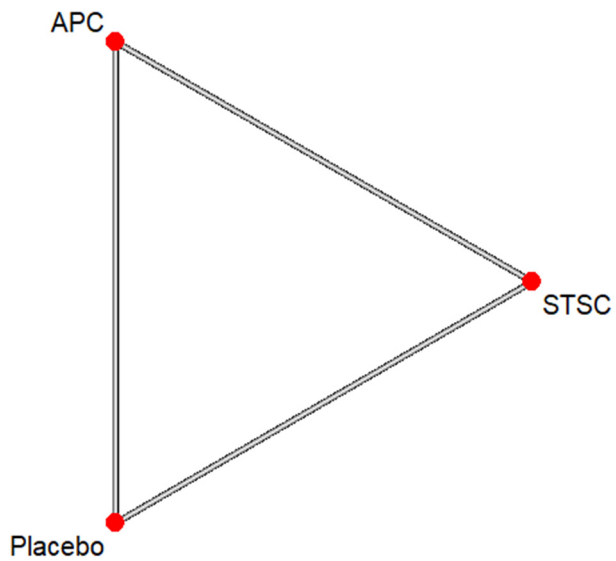

B.

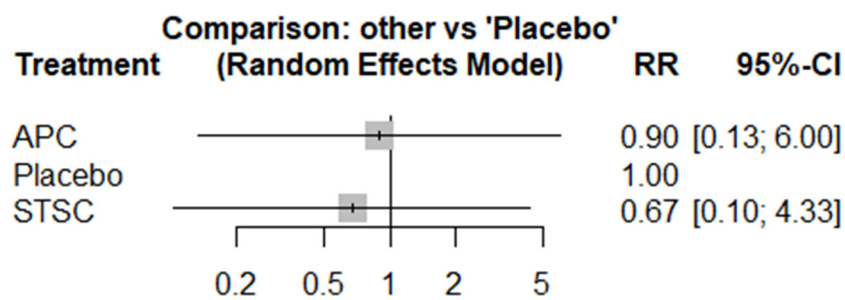

**Supplementary Figure S4.** Post polypectomy syndrome events using network meta-analysis: (A) Network diagram (the line represents a direct comparison in studies, and width of line represents number of studies), (B) Forest plot with Placebo as comparison group (APC: argon plasma coagulation, CI: confidence interval, RR: relative risk, STSC: snare tip soft coagulation).



A.

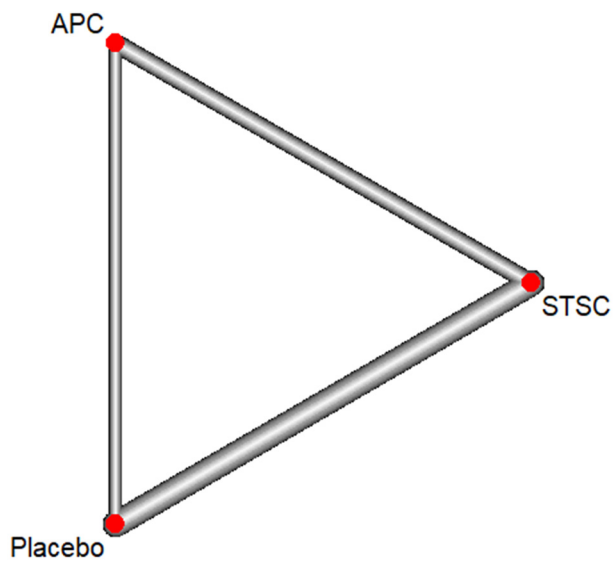

B.

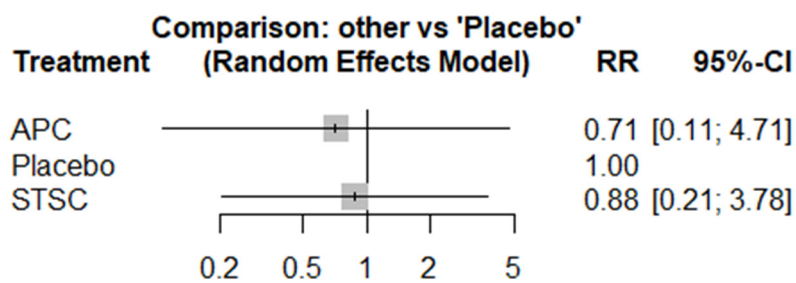

**Supplementary Figure S5.** Perforation events using network meta-analysis: (A) Network diagram (the line represents a direct comparison in studies, and width of line represents number of studies), (B) Forest plot with Placebo as comparison group (APC: argon plasma coagulation, CI: confidence interval, RR: relative risk, STSC: snare tip soft coagulation).

A.

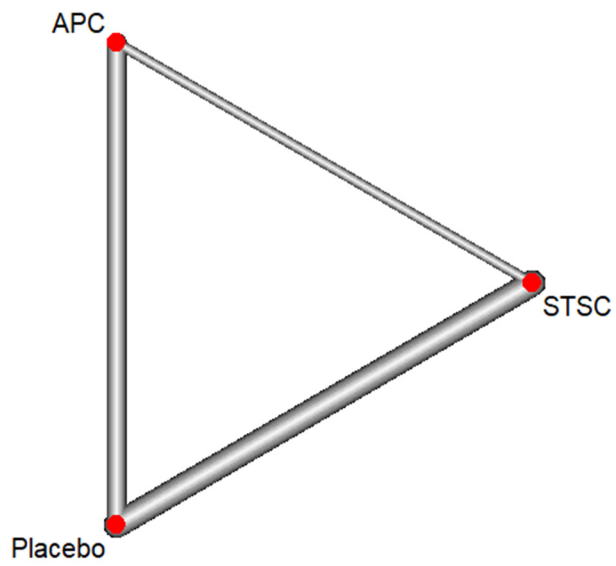

B.

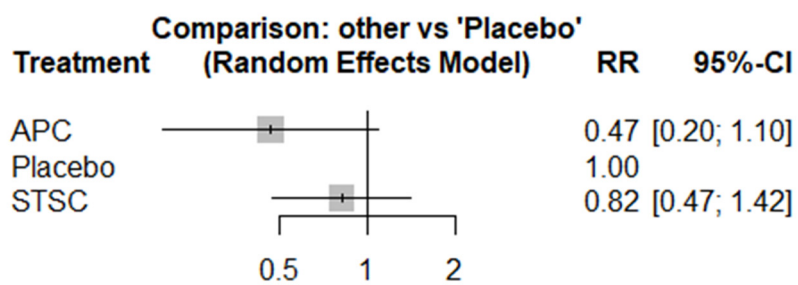

**Supplementary Figure S6.** Delayed bleeding events using network meta-analysis: (A) Network diagram (the line represents a direct comparison in studies, and width of line represents number of studies), (B) Forest plot with Placebo as comparison group (APC: argon plasma coagulation, CI: confidence interval, RR: relative risk, STSC: snare tip soft coagulation).

A.

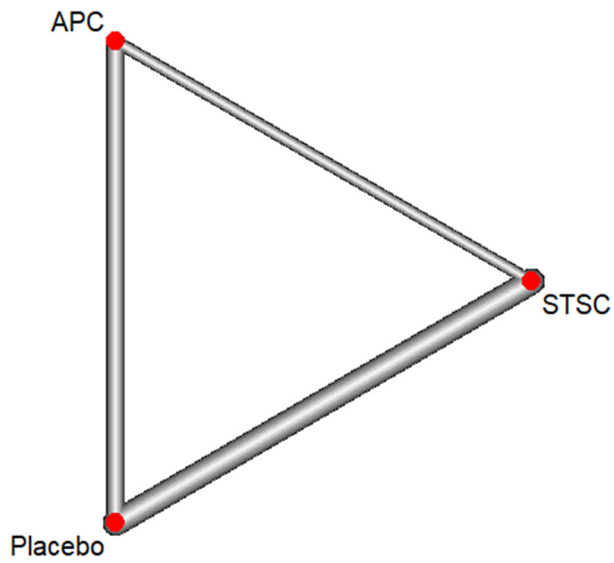

B.

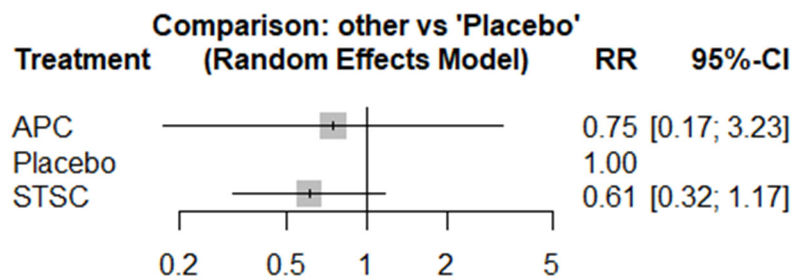

**Supplementary Figure S7.** Intraprocedural bleeding events using network meta-analysis: (A) Network diagram (the line represents a direct comparison in studies, and width of line represents number of studies), (B) Forest plot with Placebo as comparison group (APC: argon plasma coagulation, CI: confidence interval, RR: relative risk, STSC: snare tip soft coagulation).

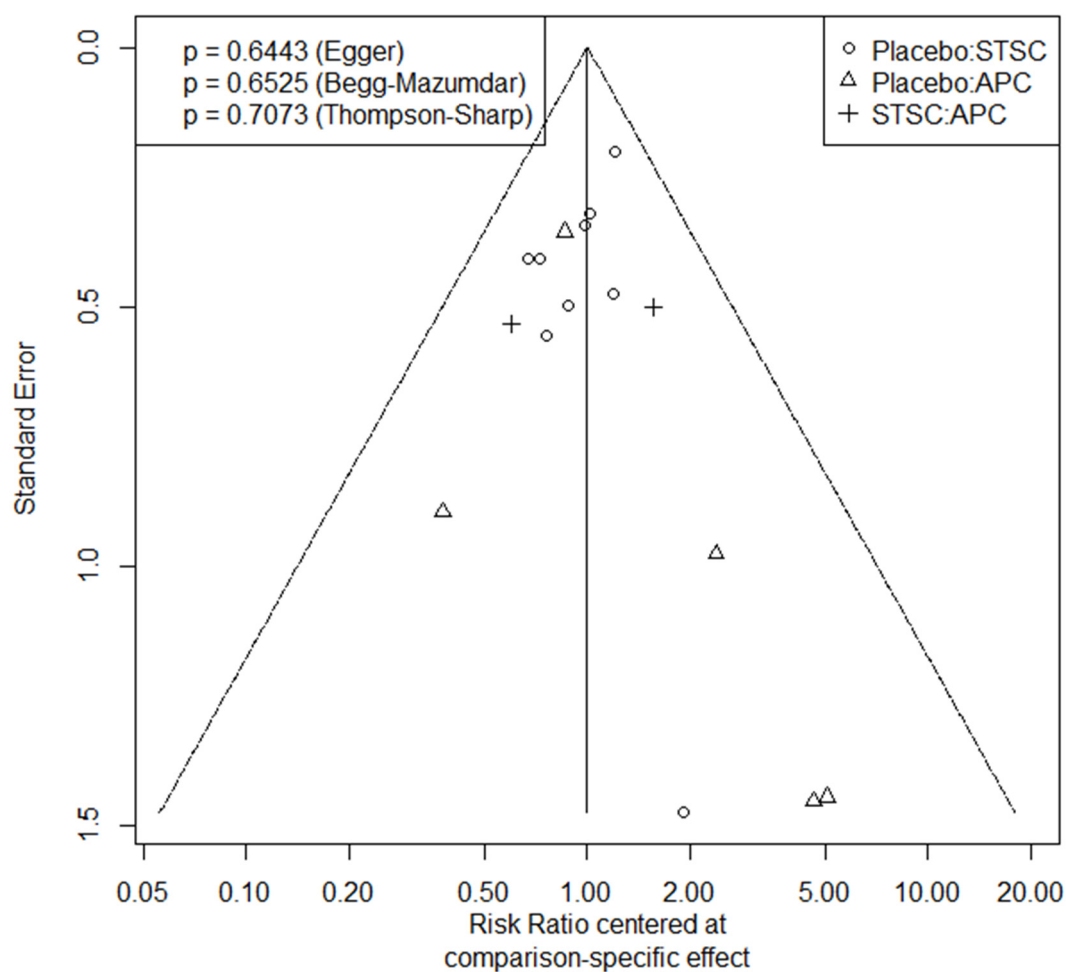

**Supplementary Figure S8.** Publication bias analysis using funnel plots and Egger's and Thompson-Sharp regression analysis (APC: argon plasma coagulation, STSC: snare tip soft coagulation).
